# Supplementary material for: Optimization of Chitosan Surface Response Methodology (Natural and Commercial) Used for Chromium Ion Removal from Wastewater across Different Parameters
Source: MDPI journal article supplement (doi:10.3390/su132313494), 2021-12-06
Supplement: s1 [file s1]

**Table S1.** Isotherms equations and constants for chromium ions adsorption onto commercial and commercial grafted chitosan.

|                             |                                                                               | Commercial chitosan |                                                                                                                              | Commercial grafted chitosan |                                                                                                                              |
|-----------------------------|-------------------------------------------------------------------------------|---------------------|------------------------------------------------------------------------------------------------------------------------------|-----------------------------|------------------------------------------------------------------------------------------------------------------------------|
|                             | Equation                                                                      | R <sup>2</sup>      | Parameters                                                                                                                   | R <sup>2</sup>              | Parameters                                                                                                                   |
| <b>Freundlich</b>           | $q_e = K_F(C_e)^{1/n}$                                                        | 0.998               | $K_F = 1.77 \text{ mgg}^{-1}$<br>$1/n = 0.665$                                                                               | 0.989                       | $K_F = 2.16 \text{ mgg}^{-1}$<br>$1/n = 0.7621$                                                                              |
| <b>Langmuir</b>             | $q_e = (q_m K_L C_e) / (1 + K_L C_e)$                                         | 0.998               | $q_m = 14.95 \text{ mgg}^{-1}$ ,<br>$K_L = 0.1189 \text{ L mg}^{-1}$                                                         | 0.998                       | $q_m = 22.94 \text{ mgg}^{-1}$ ,<br>$K_L = 0.0996 \text{ L mg}^{-1}$                                                         |
| <b>Temkin</b>               | $q_e = q_m \ln(K_T C_e)$                                                      | 0.965               | $q_m = 3.187 \text{ mgg}^{-1}$ ,<br>$K_T = 1.29 \text{ L mg}^{-1}$                                                           | 0.982                       | $q_m = 6.34 \text{ mgg}^{-1}$ ,<br>$K_T = 1.68 \text{ L mg}^{-1}$                                                            |
| <b>Dubinin-Radushkevich</b> | $q_e = q_m \exp(-D\varepsilon^2)$ that<br>$\varepsilon = RT \ln(1 + C_e - 1)$ | 0.865               | $q_m = 7.03 \text{ mgg}^{-1}$ ,<br>$K_D = 9.91 \cdot 10^{-3} \text{ mol}^2 \text{ J}^{-2}$<br>$E = 7.10 \text{ KJ mol}^{-1}$ | 0.921                       | $q_m = 7.8 \text{ mgg}^{-1}$ ,<br>$K_D = 9.19 \cdot 10^{-3} \text{ mol}^2 \text{ J}^{-2}$<br>$E = 23.41 \text{ KJ mol}^{-1}$ |

**Table S2.** Isotherms equations and constants for chromium ions adsorption onto natural and natural grafted chitosan.

|                             |                                                                               | Natural chitosan |                                                                                                                           | Natural grafted chitosan |                                                                                                               |
|-----------------------------|-------------------------------------------------------------------------------|------------------|---------------------------------------------------------------------------------------------------------------------------|--------------------------|---------------------------------------------------------------------------------------------------------------|
|                             | Equation                                                                      | R <sup>2</sup>   | Parameters                                                                                                                | R <sup>2</sup>           | Parameters                                                                                                    |
| <b>Freundlich</b>           | $q_e = K_F(C_e)^{1/n}$                                                        | 0.9965           | $K_F = 1.73 \text{ mgg}^{-1}$<br>$1/n = 0.64$                                                                             | 0.9482                   | $K_F = 2.26 \text{ mgg}^{-1}$<br>$1/n = 0.6344$                                                               |
| <b>Langmuir</b>             | $q_e = (q_m K_L C_e) / (1 + K_L C_e)$                                         | 0.9967           | $q_m = 11.73 \text{ mgg}^{-1}$ ,<br>$K_L = 0.157 \text{ L mg}^{-1}$                                                       | 0.9566                   | $q_m = 16.83 \text{ mgg}^{-1}$ ,<br>$K_L = 0.137 \text{ L mg}^{-1}$                                           |
| <b>Temkin</b>               | $q_e = q_m \ln(K_T C_e)$                                                      | 0.9586           | $q_m = 2.59 \text{ mgg}^{-1}$<br>$K_T = 1.4 \text{ L mg}^{-1}$                                                            | 0.9508                   | $q_m = 7.33 \text{ mgg}^{-1}$<br>$K_T = 1.96 \text{ L mg}^{-1}$                                               |
| <b>Dubinin-Radushkevich</b> | $q_e = q_m \exp(-D\varepsilon^2)$ that<br>$\varepsilon = RT \ln(1 + C_e - 1)$ | 0.8633           | $q_D = 6.73 \text{ mgg}^{-1}$ , $K_D = 1.35 \cdot 10^{-3} \text{ mol}^2 \text{ J}^{-2}$<br>$E = 19.3 \text{ KJ mol}^{-1}$ | 0.9555                   | $q_D = 6.72 \text{ mgg}^{-1}$ , $K_D = 0.001 \text{ mol}^2 \text{ J}^{-2}$<br>$E = 22.36 \text{ KJ mol}^{-1}$ |

**Table S3.** ANOVA results for Cr<sup>+6</sup> removal (%) using CC.

| Source                            | Sum of Square | df | Mean of Square | F-Value  | p-Value  | Significant or insignificant model terms |
|-----------------------------------|---------------|----|----------------|----------|----------|------------------------------------------|
| <b>Model</b>                      | 4589.243      | 3  | 1529.748       | 11.13807 | 0.002196 | Significant                              |
| <b>X<sub>1</sub></b>              | 37.802        | 1  | 37.802         | 22.507   | 0.005131 | Significant                              |
| <b>X<sub>2</sub></b>              | 554.653       | 1  | 554.653        | 330.246  | 0.000009 | Significant                              |
| <b>X<sub>3</sub></b>              | 4143.213      | 1  | 4143.213       | 2466.910 | 0.000000 | Significant                              |
| <b>X<sub>1</sub><sup>2</sup></b>  | 376.280       | 1  | 376.280        | 224.041  | 0.000024 |                                          |
| <b>X<sub>2</sub><sup>2</sup></b>  | 144.996       | 1  | 144.996        | 86.332   | 0.000243 |                                          |
| <b>X<sub>3</sub><sup>2</sup></b>  | 699.055       | 1  | 699.055        | 416.224  | 0.000005 |                                          |
| <b>X<sub>1</sub>X<sub>2</sub></b> | 1.124         | 1  | 1.124          | 0.669    | 0.450604 |                                          |
| <b>X<sub>1</sub>X<sub>3</sub></b> | 0.286         | 1  | 0.286          | 0.170    | 0.696844 |                                          |
| <b>X<sub>2</sub>X<sub>3</sub></b> | 47.239        | 1  | 47.239         | 28.127   | 0.003183 |                                          |
| <b>Error</b>                      | 8.398         | 5  | 1.680          |          |          |                                          |
| <b>Total SS</b>                   | 6527.551      | 14 |                |          |          |                                          |

**Table S4.** ANOVA results for Cr<sup>+6</sup> removal (%) using GCC.

| Source                            | Sum of Square | df | Mean of Square | F-Value  | p-Value  | Significant or insignificant model terms |
|-----------------------------------|---------------|----|----------------|----------|----------|------------------------------------------|
| <b>Model</b>                      | 4381.360      | 3  | 1460.453       | 12.29906 | 0.000775 | Significant                              |
| <b>X<sub>1</sub></b>              | 2.247         | 1  | 2.247          | 1.303    | 0.305355 |                                          |
| <b>X<sub>2</sub></b>              | 226.976       | 1  | 226.976        | 131.616  | 0.000088 | Significant                              |
| <b>X<sub>3</sub></b>              | 3175.683      | 1  | 3175.683       | 1841.482 | 0.000000 | Significant                              |
| <b>X<sub>1</sub><sup>2</sup></b>  | 80.774        | 1  | 80.774         | 46.838   | 0.001017 |                                          |
| <b>X<sub>2</sub><sup>2</sup></b>  | 62.948        | 1  | 62.948         | 36.502   | 0.001790 |                                          |
| <b>X<sub>3</sub><sup>2</sup></b>  | 914.183       | 1  | 914.183        | 530.107  | 0.000003 |                                          |
| <b>X<sub>1</sub>X<sub>2</sub></b> | 0.221         | 1  | 0.221          | 0.128    | 0.735030 |                                          |
| <b>X<sub>1</sub>X<sub>3</sub></b> | 0.008         | 1  | 0.008          | 0.005    | 0.948017 |                                          |
| <b>X<sub>2</sub>X<sub>3</sub></b> | 1.676         | 1  | 1.676          | 0.972    | 0.369478 |                                          |
| <b>Error</b>                      | 8.623         | 5  | 1.725          |          |          |                                          |
| <b>Total SS</b>                   | 5687.556      | 14 |                |          |          |                                          |

**Table S5.** ANOVA results for Cr<sup>+6</sup> removal (%) using NC.

| Source                            | Sum of Square | df | Mean of Square | F-Value  | p-Value  | Significant or insignificant model terms |
|-----------------------------------|---------------|----|----------------|----------|----------|------------------------------------------|
| <b>Model</b>                      | 5285.499      | 3  | 1761.833       | 12.61862 | 0.000697 | Significant                              |
| <b>X<sub>1</sub></b>              | 32.160        | 1  | 32.160         | 22.975   | 0.004913 | Significant                              |
| <b>X<sub>2</sub></b>              | 591.676       | 1  | 591.676        | 422.681  | 0.000005 | Significant                              |
| <b>X<sub>3</sub></b>              | 4420.580      | 1  | 4420.580       | 3157.973 | 0.000000 | Significant                              |
| <b>X<sub>1</sub><sup>2</sup></b>  | 371.309       | 1  | 371.309        | 265.256  | 0.000016 |                                          |
| <b>X<sub>2</sub><sup>2</sup></b>  | 186.711       | 1  | 186.711        | 133.383  | 0.000085 |                                          |
| <b>X<sub>3</sub><sup>2</sup></b>  | 674.505       | 1  | 674.505        | 481.853  | 0.000004 |                                          |
| <b>X<sub>1</sub>X<sub>2</sub></b> | 0.018         | 1  | 0.018          | 0.013    | 0.913596 |                                          |
| <b>X<sub>1</sub>X<sub>3</sub></b> | 0.007         | 1  | 0.007          | 0.005    | 0.945512 |                                          |
| <b>X<sub>2</sub>X<sub>3</sub></b> | 51.390        | 1  | 51.390         | 36.712   | 0.001767 |                                          |
| <b>Error</b>                      | 6.999         | 5  | 1.400          |          |          |                                          |
| <b>Total SS</b>                   | 6821.338      | 14 |                |          |          |                                          |

**Table S6.** ANOVA results for Cr<sup>+6</sup> removal (%) using GCC.

| Source                            | Sum of Square | df | Mean of Square | F-Value  | p-Value  | Significant or insignificant model terms |
|-----------------------------------|---------------|----|----------------|----------|----------|------------------------------------------|
| <b>Model</b>                      | 4144.071      | 3  | 1381.357       | 10.95417 | 0.001244 | Significant                              |
| <b>X<sub>1</sub></b>              | 44.368        | 1  | 44.368         | 5.9268   | 0.059052 |                                          |
| <b>X<sub>2</sub></b>              | 477.228       | 1  | 477.228        | 63.7493  | 0.000497 | Significant                              |
| <b>X<sub>3</sub></b>              | 3179.685      | 1  | 3179.685       | 424.7505 | 0.000005 | Significant                              |
| <b>X<sub>1</sub><sup>2</sup></b>  | 164.109       | 1  | 164.109        | 21.9222  | 0.005423 |                                          |
| <b>X<sub>2</sub><sup>2</sup></b>  | 66.550        | 1  | 66.550         | 8.8900   | 0.030743 |                                          |
| <b>X<sub>3</sub><sup>2</sup></b>  | 797.403       | 1  | 797.403        | 106.5191 | 0.000147 |                                          |
| <b>X<sub>1</sub>X<sub>2</sub></b> | 1.000         | 1  | 1.000          | 0.1336   | 0.729699 |                                          |
| <b>X<sub>1</sub>X<sub>3</sub></b> | 2.496         | 1  | 2.496          | 0.3335   | 0.588647 |                                          |
| <b>X<sub>2</sub>X<sub>3</sub></b> | 51.654        | 1  | 51.654         | 6.9000   | 0.046714 |                                          |
| <b>Error</b>                      | 37.430        | 5  | 7.486          |          |          |                                          |
| <b>Total SS</b>                   | 5531.208      | 14 |                |          |          |                                          |
